1 **Comparing human vs. machine-assisted analysis to develop a new approach for Big**  
2 **Qualitative Data Analysis.**

3

4 **Sam Martin<sup>1¶</sup>, Emma Beecham (joint first author)<sup>2\*¶</sup>, Emira Kursumovic<sup>3</sup>, Richard A. Armstrong<sup>4</sup>, Tim M.**  
5 **Cook<sup>5</sup>, Noémie Déom<sup>2</sup>, Andrew D. Kane<sup>6</sup>, Sophie Moniz<sup>2</sup>, Jasmeet Soar<sup>7</sup> and Cecilia Vindrola-Padros<sup>2</sup>**  
6 **and collaborators<sup>^</sup>**

7 1 Rapid Research Evaluation and Appraisal Lab (RREAL), Department of Targeted Intervention, University  
8 College London (UCL), London, UK; Oxford Vaccine Group, Department of Paediatrics, Oxford University,  
9 Oxford, UK

10 2 Rapid Research Evaluation and Appraisal Lab (RREAL), Department of Targeted Intervention, University  
11 College London (UCL), London, UK

12 3 Department of Anaesthesia, Royal United Hospitals Bath NHS Foundation Trust, Bath, UK; Health  
13 Services Research Centre, Royal College of Anaesthetists, London, UK

14 4 Department of Anaesthesia, Severn Deanery, Bristol, UK; Health Services Research Centre, Royal  
15 College of Anaesthetists, London, UK

16 5 Department of Anaesthesia, Royal United Hospital, Bath; University of Bristol School of Medicine, UK

17 6 Department of Anaesthesia, James Cook University Hospital, South Tees NHS Foundation Trust,  
18 Middlesbrough, UK; Health Services Research Centre, Royal College of Anaesthetists, London, UK

19 7 Department of Anaesthesia, Southmead Hospital, North Bristol NHS Trust, Bristol, UK

20

21 **\* Corresponding author**

22 **Email: [e.beecham@ucl.ac.uk](mailto:e.beecham@ucl.ac.uk) (EB)**

23 <sup>¶</sup> These authors contributed equally to this work.

24 ^ For collaborators, see online Supporting Information Appendix S1.

25

26

27

28

29

30

## 31 **Abstract**

32 Background: Analysing large qualitative datasets can present significant challenges, including the time  
33 and resources required for manual analysis and the potential for missing nuanced insights. This paper  
34 aims to address these challenges by exploring the application of Big Qualitative (Big Qual) and artificial  
35 intelligence (AI) methods to efficiently analyse Big Qual data while retaining the depth and complexity of  
36 human understanding. The free-text responses from the Royal College of Anaesthetists' 7th National  
37 Audit Project (NAP7) baseline survey on peri-operative cardiac arrest experiences serve as a case study  
38 to test and validate this approach.

39 Methodology/Principal Findings: Quantitative analysis segmented the data and identified keywords  
40 using AI methods. In-depth sentiment and thematic analysis combined natural language processing  
41 (NLP) and machine learning (ML) with human input - researchers assigned topic/theme labels and  
42 sentiments to responses, while discourse analysis explored sub-topics and thematic diversity. Human  
43 annotation refined the machine-generated sentiments, leading to an additional "ambiguous" category  
44 to capture nuanced, mixed responses. Comparative analysis was used to evaluate the concordance  
45 between human and machine-assisted sentiment labelling. While ML reduced analysis time significantly,  
46 human input was crucial for refining sentiment categories and capturing nuances.

47 Conclusions/Significance: The application of AI-assisted data analysis tools, combined with human  
48 expertise, offers a powerful approach to efficiently analyse large-scale qualitative datasets while  
49 preserving the nuance and complexity of the data. This study demonstrates the potential of this novel  
50 methodology to streamline the analysis process, reduce resource requirements, and generate  
51 meaningful insights from Big Qual data. The integration of NLP, ML, and human input allows for a more  
52 comprehensive understanding of the themes, sentiments, and experiences captured in free-text  
53 responses. This study underscores the importance of continued interdisciplinary collaboration among  
54 domain experts, data scientists, and AI specialists to optimise these methods, ensuring their reliability,

55 validity, and ethical application in real-world contexts.

56

## 57 **Author Summary**

58 The use of Artificial intelligence (AI) in health research has grown over recent years. However, analysis of  
59 large qualitative datasets known as Big Qualitative Data, in public health using AI, is a relatively new area  
60 of research. Here, we use novel techniques of machine learning and natural language processing where  
61 computers learn how to handle and interpret human language, to analyse a large national survey. The  
62 Royal College of Anaesthetists' 7th National Audit Project is a large UK-wide initiative examining peri-  
63 operative cardiac arrest. We use the free-text data from this survey to test and validate our novel  
64 methods and compare analysing the data by hand (human) vs. human-machine learning also known as  
65 'machine-assisted' analysis. Using two AI tools to conduct the analysis we found that the machine-  
66 assisted analysis significantly reduced the time to analyse the dataset. Extra human input, however, was  
67 required to provide topic expertise and nuance to the analysis. The AI tools reduced the sentiment  
68 analysis to positive, negative or neutral, but the human input introduced a fourth 'ambiguous' category.  
69 The insights gained from this approach present ways that AI can help inform targeted interventions and  
70 quality improvement initiatives to enhance patient safety, in this case, in peri-operative cardiac arrest  
71 management.

72

## 73 **Introduction**

74 The primary focus of this paper is to examine and compare human vs. human-machine learning (ML)  
75 enhanced analysis of a large qualitative dataset on the topic of peri-operative cardiac arrest. Through  
76 this comparison, we seek to assess the effectiveness and efficiency of machine-assisted analysis in  
77 relation to human analysis, while still capturing the valuable insights provided by human expertise in the  
78 context of patient safety research. We use the Royal College of Anaesthetists' 7th National Audit Project  
79 (NAP7) survey to enable this comparison. The NAP7 methodology included two baseline surveys [1, 2],  
80 the second of which assessed knowledge, attitudes, practices and experiences of anaesthetists and  
81 anaesthesia associates relating to peri-operative cardiac arrest (S2 Appendix).

82 Big Qualitative (Big Qual) analysis of large free-text data using Artificial Intelligence (AI) techniques such  
83 as ML and natural language processing (NLP) shows an increased potential to handle large amounts of  
84 public health information [3]. Big Qual data is defined as datasets containing at least 100 participants,  
85 either as a stand-alone project or within a large quantitative study [4]. The ability to handle large  
86 amounts of data is particularly important in health research when there can be huge datasets from  
87 surveys or audit data and there is a need to rapidly analyse the results and make changes to clinical  
88 practice - e.g., during a pandemic when decisions need to be made quickly. The use of AI in health  
89 research has grown over recent years, recently culminating in the World Health Organisation (WHO)  
90 guidance document on the ethics and governance of AI for health [5]. However, the application of AI in  
91 Big Qual analysis public health datasets is still in its infancy, while the community works on defining  
92 appropriate methods, standards, regulations, and tools to use to analyse Big Qual data [6].

93 Patient safety and quality improvement in healthcare is one area that has seen benefits from the  
94 application of Big Qual research methods [7]. Researchers have employed these techniques to analyse  
95 data from sources such as social media and survey responses, identifying themes related to public  
96 health issues such as vaccine hesitancy in pregnant women [8]. Big Qual research methods, such as ML

97 and NLP, are increasingly being applied to large healthcare datasets to gain insights and inform quality  
98 improvement efforts. While NLP offers the ability to rapidly analyse vast amounts of data, a criticism is  
99 that it may miss nuances captured by human qualitative analysis [9]. To address this, an approach  
100 combining NLP with expert human input, known as "machine-assisted topic analysis," has been  
101 proposed [10]. While ML shows promise for classifying incident reports [11], we argue that a balance  
102 with manual processing remains crucial for a nuanced analysis.

103 The initial NAP7 survey with over 10,000 clinician responses provided a good data context to conduct a  
104 comparative analysis between human coding and AI methods [2]. In this paper we show how Big Qual  
105 analysis can support these quantitative findings by providing nuance and examples of anesthesiologists'  
106 experiences. The study aims to apply machine-assisted sentiment, discourse, and thematic analysis to  
107 the free-text data from a large national survey of anesthesiologists (NAP7) on peri-operative cardiac arrest  
108 experiences [2] and compare against human-only analysis.

109

## 110 **Methodology**

### 111 **Data preparation**

112 The primary aim of this study was to compare the effectiveness and efficiency of machine-assisted  
113 analysis, using the AI tools Infranodus [12, 13] and Caplena [14], against human-only analysis in the  
114 context of qualitative data from the NAP7 Baseline Survey. By employing a comparative approach, we  
115 sought to assess the potential benefits and limitations of integrating AI tools into the qualitative  
116 research process, while maintaining the nuance and context provided by human researchers. This  
117 comparative methodology was applied throughout the data preparation, analysis, and interpretation  
118 stages of the study. The methodology for this study involved several steps (Fig 1). First, all 10,746

119 responses were downloaded from the SurveyMonkey® survey [15] to Excel. Two researchers, one digital  
120 analyst and one anaesthetist (SM1, EK), cleaned the data in Excel over two months. This process  
121 involved checking responses, creating a coding key to explain medical terms/slang for non-medical team  
122 members, adapting response categories, removing duplicates, and converting free-text responses for  
123 each question into a CSV file [2]. Researchers (EK and SM1) chose questions to analyse based on their  
124 relevance to the impact of peri-operative events on anaesthetists' well-being and confidence. They  
125 chose six main questions (Q2, Q4, Q30, Q36, Q41 and Q43) that best answered the related themes and  
126 quantitative findings of the main paper [2]- giving a final sample of 5,196 responses. These included  
127 confidence levels in managing peri-operative cardiac arrest, insights into debriefing practices, having a  
128 rest break, or stopping work after being involved in a cardiac arrest, the prevalence of informal vs.  
129 formal well-being support and improvements needed in the post-cardiac arrest management or staff.  
130 Next, quantitative free-text analysis was performed using AI methods via the Pulsar Platform [16],  
131 where segmentation and keyword analysis were conducted to identify key topics of concern, key actors  
132 (e.g., segmentation by gender and stage in career), as well as word frequency analysis. These data were  
133 then used as a base template for the main thematic and sentiment analysis.

134 We consulted the Standards for Reporting Qualitative Research (SRQR) guidelines to present the  
135 methodological process and the results [17].

## 136 **Data analysis-Natural Language Processing**

137 Natural language processing (NLP) analytics [14] were combined with human input for sentiment  
138 analysis. Using Caplena, each response or statement was assigned a topic/theme label or sub-  
139 topic/theme. This meant that a response might have three sub-topics/themes attached to it. To train  
140 the Caplena model, five researchers including social scientists, a digital analyst, and an anaesthetist (EB,  
141 SM2, ND, SM1, EK,) reviewed a small subset of around 10% of the responses for each question, adding

142 themes and sub-themes, revising labelling, and at times correcting labels. The model then learned from  
143 the changes made by the researchers and adjusted its labelling of the dataset to improve accuracy.  
144 Researchers documented the changes they made in each section before any subsequent changes to  
145 evaluate how well the model learned from human coding and to ensure consistency.

## 146 **Data analysis - Sentiment analysis**

147 A sentiment analysis framework was established to categorise sentiments in the Baseline Survey  
148 responses (Fig 2). This framework guided the training of sentiment and thematic analysis tools. Three  
149 researchers (EB, SM1, EK) were involved in the initial manual annotation of the data, adding columns for  
150 the overarching sentiments: positive, negative, and neutral. The initial agreement among all three  
151 annotators was 80%. For the next stage, two researchers (EB and SM1) compared machine-generated  
152 sentiments with those initially assigned by the three human annotators. The agreement between these  
153 two main human annotators (EB, SM1) at this stage was 82%. After discussing and resolving  
154 discrepancies, the final agreement between EB and SM1 reached 100% for some themes and 92% for  
155 others. However, during the comparative analysis, with an in-depth reading of the responses - it became  
156 evident that the standard sentiment framework consisting of positive, negative, and neutral labels was  
157 insufficient to capture the nuances and complexities present in the free-text descriptions of  
158 anaesthetists' experiences of cardiac incidents and their impact. The human annotators recognised the  
159 need for an additional sentiment label. This was initially labelled as "nuanced/mixed" [2], however, to  
160 ensure clarity and consistency in our analysis, we have revised the sentiment label to the name:  
161 "ambiguous" - as well as more clearly defined each sentiment in Fig 2 - to better represent the subtleties  
162 and ambiguities inherent in the text. Additionally, four columns (one by each of the four sentiments  
163 (positive, negative neutral and ambiguous) were added to the analysis spreadsheet for each researcher  
164 to assign a percentage to each sentiment option, allowing for a more granular representation of



165 sentiment and acknowledging that a single response may contain elements of multiple sentiments in  
166 varying proportions. To aid in model building and ensure consistency, the researchers followed a specific  
167 protocol (Fig 2) when assigning sentiment percentages, requiring the assigned percentages to sum up to  
168 100% for each response.

## 169 **Data analysis - Sub-analysis: thematic and discourse analysis**

170 A sub-analysis of the main themes identified with Caplena was conducted using the text network  
171 analysis tool Infranodus for discourse and thematic analysis, measuring themes and patterns around  
172 peri-operative cardiac arrest. The betweenness centrality of sub-topics was explored, which is a  
173 measure of how often a particular sub-topic acts as a bridge connecting different topic clusters. By  
174 analysing the connections between sub-topics, we were able to identify similarities in opinions and  
175 experiences expressed by participants, providing a more nuanced understanding of the relationships  
176 between various themes. Data was imported by question and theme into Infranodus to highlight  
177 keyword clusters of interest and the most influential topics. The distribution of topics across survey  
178 questions was measured where the most prominent relations between the nodes for each topic were  
179 represented by the closeness/betweenness of different clusters in relation to each other (Fig 3).

180 It is worth noting that all three programmes, Pulsar, Caplena, and Infranodus, adhere to stringent  
181 privacy policies and ensure that no data is processed or sent outside of the EU. The NAP7 data uploaded  
182 to these AI tools will be retained solely for the duration of the current project and will be deleted six  
183 months after the project's conclusion. Importantly, the data utilised in these programmes is strictly  
184 confined to the purposes of this research and is not employed for any other use. The programmes were  
185 also all used within UCL's servers, which provide another level of security and protection.

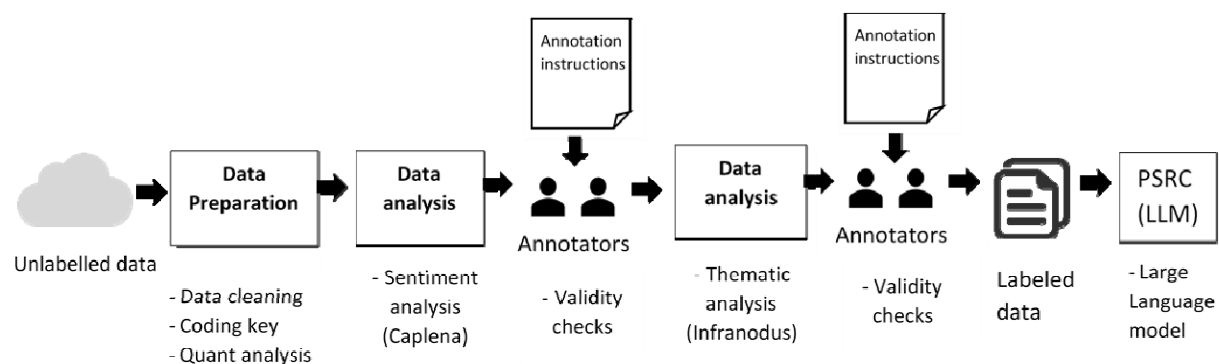

186

187 **Fig 1. Human assisted machine learning approach.** PSRC = Patient Safety Research Collaboration, LLM =  
188 Large Language Model.

## 189 Results

190 In total, 10,746 responses to the survey were received, representing a 71% response rate [1]. Twenty-  
191 seven of the 57 survey questions required a free-text response. A final selection of 5,196 responses  
192 were then chosen to be analysed within the main themes of the initial paper [2].

193 Initially, for each of the key questions from the survey, researchers produced tables containing the  
194 themes derived from Infranodus, categorising the responses into positive or good experiences, negative  
195 or bad experiences, and neutral experiences. As discussed in the methodology, in the second stage of  
196 analysis, the human annotators identified the necessity to introduce an 'ambiguous' category to capture  
197 the nuances in the free-text responses.

## 198 Human vs Computer assisted analysis

199 Computer assisted sentiment tagged 36% (n=1871) of all 5196 themed responses as neutral, 20%  
200 (n=1039) as Negative, and 44% (n=2286) as positive. After nuances in some more complex answers  
201 initially rated as neutral by computer assisted tagging were spotted by human annotators, a second  
202 round of annotation with the newly developed sentiment framework (Fig 2) showed that far fewer

203 comments fell within the context of neutral sentiment – 7% (n=406) versus the initial 36% (n=1871).  
204 Validity checking by human annotators found a much more even spread between ambiguous (n=355)  
205 and neutral sentiment (n=406) ~ 7% each, while an extra 3% of responses were tagged as positive (47%,  
206 n= 2426), and 39% (n=2009) were tagged by humans as negative. The human-only analysis took 255  
207 hours (Table 5- S3 Appendix), 210 hours (over about 26 days) of which consisted of coding the themes,  
208 while the machine-assisted coding only required 5 hours (Table 6- S3 Appendix). The computer-assisted  
209 analysis demonstrated a good range of accuracy of 72% in sentiment classification and 78% in thematic  
210 analysis, compared to the human-annotated dataset [2]. Inter-annotator agreement between human  
211 experts was 82%, indicating a good level of consistency in the manual annotation process [2]. However,  
212 the machine-assisted analysis required human intervention to refine the sentiment categories (40  
213 hours), particularly in cases where the responses contained ambiguous or mixed sentiments, resulting in  
214 the machine-assisted analysis taking 88 hours in total. In Fig 2 below, the sentiment analysis framework  
215 shows the definition of each sentiment coded, including the differences between neutral and ambiguous  
216 within the context of this study.

217

218

219

|                                                                                                                                                                                                                                                                                                                                                                                                                                                                                                                                                |                                                                                                                                                                                                                                                                                                                                                                                                                                                                                               |
|------------------------------------------------------------------------------------------------------------------------------------------------------------------------------------------------------------------------------------------------------------------------------------------------------------------------------------------------------------------------------------------------------------------------------------------------------------------------------------------------------------------------------------------------|-----------------------------------------------------------------------------------------------------------------------------------------------------------------------------------------------------------------------------------------------------------------------------------------------------------------------------------------------------------------------------------------------------------------------------------------------------------------------------------------------|
| <p><b>Positive</b></p> <ul style="list-style-type: none"> <li>• Response communicates positive experiences of effectively managed peri-operative cardiac arrests</li> <li>• Indicates satisfaction with guidelines, procedures, teamwork, and outcomes</li> <li>• Describes confidence in leading the team and managing the arrest</li> <li>• Expresses positive sentiments about the debriefing process</li> </ul>                                                                                                                            | <p><b>Negative</b></p> <ul style="list-style-type: none"> <li>• Communicates negative experiences and dissatisfaction with the management of peri-operative cardiac arrests</li> <li>• Indicates a lack of awareness, clarity, or sufficiency of guidelines</li> <li>• Describes chaotic environments, team communication breakdowns, or suboptimal patient outcomes</li> <li>• Expresses negative sentiments about the absence or inadequacy of debriefing processes</li> </ul>              |
| <p><b>Neutral</b></p> <ul style="list-style-type: none"> <li>• Contains factual observations or statements about peri-operative cardiac arrests without explicit positive or negative sentiment</li> <li>• Provides objective descriptions of the arrest management, team dynamics, and patient outcomes</li> <li>• Offers recommendations for protocol or guideline improvements without emotional overtones</li> <li>• Includes purely informational comments about the debriefing process without expressing personal sentiments</li> </ul> | <p><b>Ambiguous</b></p> <ul style="list-style-type: none"> <li>• Contains both positive and negative elements in describing the peri-operative cardiac arrest experience</li> <li>• Expresses uncertainty or mixed feelings about guidelines, team dynamics, or patient outcomes</li> <li>• Indicates a need for improvement in certain areas while acknowledging positive aspects</li> <li>• Describes debriefing experiences that had both beneficial and detrimental components</li> </ul> |

220  
 221 **Fig 2. Sentiment Analysis Framework: Definitions of Positive, Negative, Neutral and Ambiguous**  
 222 **sentiment – coded by human annotators.**

223  
 224 The comparison of human and machine-assisted analysis approaches revealed several key findings. The  
 225 machine-assisted analysis significantly reduced the time required to analyse the large dataset, enabling  
 226 a more efficient processing of the qualitative data. While the overall percentages of positive and

227 negative sentiments did not vary drastically between the computer-assisted tagging and human  
228 annotation, the introduction of the "ambiguous" sentiment category in the new framework allowed for  
229 a more nuanced understanding of the responses and insights into peri-operative cardiac arrest  
230 experiences. By distinguishing between truly neutral sentiments and those that were more complex or  
231 ambiguous, the human annotators were able to provide a more accurate representation of the  
232 respondents' experiences.

### 233 **Thematic analysis**

234 In terms of thematic analysis - this paper details the Big Qual methods by analysing themes from Tables  
235 1-4, focusing on guidelines for managing peri-operative cardiac arrests, recent incident management,  
236 and debriefing processes [2]. Over six months, four researchers (EK, SM1, SM2, ND) analysed and  
237 categorised the NAP7 free-text data for 13 key questions, supporting the AI tools during the machine  
238 learning phase.

239 Table 1 below is an example output from the AI tools for key questions that helped researchers analyse  
240 the themes. Table 1 presents main themes such as Patient Outcome, Leadership and Teamwork,  
241 Management Procedures, Recognition of Arrest and Treatment, and Chaos. Additional themes (detailed  
242 in Tables 2-4 in the supplementary information S3 Appendix) include Awareness and Adequacy of  
243 Guidelines, Specific Scenarios (Table 2), Debrief (Table 3), Support, Confidence, and Mental Health  
244 Impact, and Learned from Experience, Overall Improvement (Table 4). All themes were human-  
245 annotated for sentiment.

246

247

248 **Table 1. 'Free-text' comments and themes from 1869 anaesthetists regarding the management of the**  
 249 **peri-operative cardiac arrest that they most recently attended.** The themes and sentiment categories  
 250 (positive, neutral/mixed, negative) were determined by the ML tools. The sentiment category  
 251 'Ambiguous' was added by human annotators. *CALS, Cardiac advanced life support; ODP, operating*  
 252 *department practitioners; PPE, personal protective equipment; ROSC, return of spontaneous circulation.*

| Themes (Q2 and Q30 - number of sentiments)                                                                                                                                                                                                                 | Examples                                                                                                                                                                                                                                                                                                                                                                                                                                                                                                                                                                                                                                                                                                                                                                                                                                                                                                                                                                                                                     |
|------------------------------------------------------------------------------------------------------------------------------------------------------------------------------------------------------------------------------------------------------------|------------------------------------------------------------------------------------------------------------------------------------------------------------------------------------------------------------------------------------------------------------------------------------------------------------------------------------------------------------------------------------------------------------------------------------------------------------------------------------------------------------------------------------------------------------------------------------------------------------------------------------------------------------------------------------------------------------------------------------------------------------------------------------------------------------------------------------------------------------------------------------------------------------------------------------------------------------------------------------------------------------------------------|
| <p>Patient outcome (n=1182)</p> <ul style="list-style-type: none"> <li>• <i>Positive comments (n=964)</i></li> <li>• <i>Neutral comments (n=22)</i></li> <li>• <i>Ambiguous comments (n=33)</i></li> <li>• <i>Negative comments (n=163)</i></li> </ul>     | <p><i>Positive examples</i><br/>                     'Successful outcome, no issues, concerns.'<br/>                     'Good initial outcome. Although very stressful as significant uncertainty over the actual diagnosis.'</p> <p><i>Neutral examples</i><br/>                     'Corroborated by Serious Incident investigation.'<br/>                     'Discharged from hospital.'</p> <p><i>Ambiguous examples</i><br/>                     'The QRH is useful but doesn't go through the nuances and most likely causes for specific patient cohorts.'<br/>                     'There still some grey areas with regards to advice, for example DNACPR patients undergoing surgery.'</p> <p><i>Negative examples</i><br/>                     'CALS protocol followed, chest opened and ROSC but not that well led by ICU consultant'.<br/>                     'ROSC was obtained after first cardiac arrest...delay in transferring patient to intensive care... Patient then had second cardiac arrest'</p> |
| <p>Leadership and teamwork (n=313)</p> <ul style="list-style-type: none"> <li>• <i>Positive comments (n=285)</i></li> <li>• <i>Neutral comments (n=2)</i></li> <li>• <i>Ambiguous comments (n=3)</i></li> <li>• <i>Negative comments (n=23)</i></li> </ul> | <p><i>Positive Examples</i><br/>                     'Good teamwork. Got child back very quickly.'<br/>                     'Theatre team worked very well together. All commented that it had felt like Sim training.'</p> <p><i>Neutral examples</i><br/>                     'This happened in radiology and resuscitation and senior anaesthesia teams had to be summoned.'<br/>                     'Leading ITU consultant led arrest and outcome wouldn't have changed.'</p> <p><i>Ambiguous examples</i><br/>                     'Never exposed to this scenario in real life or simulation, complex situation with multiple additional and complex factors compared with a 'standard' ward arrest (different team with variable skill set and mix - team management more complex, requires management from anaesthetic and surgical</p>                                                                                                                                                                            |

|                                                                                                                                                                                                                                                                           |                                                                                                                                                                                                                                                                                                                                                                                                                                                                                                                                                                                                                                                                                                                                                                                                                                                                                                                                                                                                                                                                                                          |
|---------------------------------------------------------------------------------------------------------------------------------------------------------------------------------------------------------------------------------------------------------------------------|----------------------------------------------------------------------------------------------------------------------------------------------------------------------------------------------------------------------------------------------------------------------------------------------------------------------------------------------------------------------------------------------------------------------------------------------------------------------------------------------------------------------------------------------------------------------------------------------------------------------------------------------------------------------------------------------------------------------------------------------------------------------------------------------------------------------------------------------------------------------------------------------------------------------------------------------------------------------------------------------------------------------------------------------------------------------------------------------------------|
|                                                                                                                                                                                                                                                                           | <p>perspective, consideration of anaesthetic and surgical as well as patient factors as a cause etc.)’</p> <p>‘I am confident in the management of cardiac arrests in general, intra-operative is an unexpected and complex situation with a procedure at varying degrees of completion or ability to easily pause and considerations of sterility etc. Therefore, the human factors and team working in this scenario are often significantly challenging and unfamiliar.’</p> <p><i>Negative examples</i></p> <p>‘No leader, consultant in list in disarray, others helping in slightly uncoordinated fashion, but shocks delivered and outcome good.’</p> <p>‘Consultant refused to recognise patient had arrested, had to overrule him’</p>                                                                                                                                                                                                                                                                                                                                                          |
| <p>Management procedures e.g., guidelines (n=202)</p> <ul style="list-style-type: none"> <li>• <i>Positive comments (n=169)</i></li> <li>• <i>Neutral comments (n=6)</i></li> <li>• <i>Ambiguous comments (n=8)</i></li> <li>• <i>Negative comments (n=19)</i></li> </ul> | <p><i>Positive examples</i></p> <p>‘Well managed, major haemorrhage protocol already activated.’</p> <p>‘Good prompt resuscitation of patient. We followed the guidelines to a high standard.’</p> <p><i>Neutral examples</i></p> <p>‘Standard arrest management’</p> <p>‘I came in as support during the arrest - I can't comment on the management at the start of the case.’</p> <p><i>Ambiguous examples</i></p> <p>‘I feel as if I understand the appropriate management and protocols but have never been in this scenario so hesitate to say I am confident.’</p> <p>‘There are times however where there may be tasks, I would have to do, for example, manage the airway, making it difficult to also lead the management!’</p> <p><i>Negative examples</i></p> <p>‘Management was hampered by difficulty in communication and obtaining equipment due to COVID and PPE.’</p> <p>‘Mandatory to put out hospital cardiac arrest call. Medical team unfamiliar with IR suite and the procedure being undertaken. Also unfamiliar with anaesthesia and standard processes that were underway.’</p> |
| <p>Recognition of arrest and treatment (n=90)</p> <ul style="list-style-type: none"> <li>• <i>Positive comments (n=83)</i></li> <li>• <i>Neutral comments (n=1)</i></li> </ul>                                                                                            | <p><i>Positive examples</i></p> <p>‘Early identification of deteriorating patient and appropriate management, whole arrest team was present before the event.’</p> <p>‘There was a prompt recognition of the cardiac arrest with a</p>                                                                                                                                                                                                                                                                                                                                                                                                                                                                                                                                                                                                                                                                                                                                                                                                                                                                   |

|                                                                                                                                                                                                            |                                                                                                                                                                                                                                                                                                                                                                                                                                                                                                                                                                                                                                                                                                                                                                                                                                                     |
|------------------------------------------------------------------------------------------------------------------------------------------------------------------------------------------------------------|-----------------------------------------------------------------------------------------------------------------------------------------------------------------------------------------------------------------------------------------------------------------------------------------------------------------------------------------------------------------------------------------------------------------------------------------------------------------------------------------------------------------------------------------------------------------------------------------------------------------------------------------------------------------------------------------------------------------------------------------------------------------------------------------------------------------------------------------------------|
| <ul style="list-style-type: none"> <li>• Ambiguous comments (n=0)</li> <li>• Negative comments (n=6)</li> </ul>                                                                                            | <p>high index of suspicion as to the cause throughout.'</p> <p><i>Neutral example</i><br/>'It was a peri arrest situation.'</p> <p><i>Negative examples</i><br/>'Consultant refused to recognise patient had arrested, had to overrule him to get ODP to start chest compressions.'<br/>'Not recognised early enough. Poor communication from surgeon who insisted it must be an airway problem.'</p>                                                                                                                                                                                                                                                                                                                                                                                                                                               |
| <p>Chaos (n=82)</p> <ul style="list-style-type: none"> <li>• Positive comments (n=19)</li> <li>• Neutral comments (n=4)</li> <li>• Ambiguous comments (n=5)</li> <li>• Negative comments (n=54)</li> </ul> | <p><i>Positive example</i><br/>'Very difficult case with multiple problems at the same time. We did the best we could!'</p> <p><i>Neutral example</i><br/>'Initially very busy/chaotic as 2222 call put out and medical team arrived. Then ICU consultant (Echo trained) arrived and took over lead.'</p> <p><i>Ambiguous examples</i><br/>'Chaotic at the beginning.'<br/>'Clinically managed well, patient had good outcome. Felt chaotic as input from medical team with minimal experience in perioperative arrest.'</p> <p><i>Negative examples</i><br/>'Too many people giving orders, disorganised.'<br/>'A bit chaotic as a lot of people and equipment in a small room.'<br/>'Chaotic environment with different people trying to lead.'</p> <p>'A lot of people involved, sometimes difficult to see what is being or has been done.'</p> |

253 We then further analysed the themes in Infranodus. The theme “chaos” refers to the chaotic nature of  
 254 the management of the arrest. We use this theme to further demonstrate an example of the nuances in  
 255 the clinicians' responses using Infranodus and Caplena (Table 1), where the negative, positive, neutral,  
 256 and ambiguous examples of “chaos” varied depending on the complexity of each situation. In Fig 3, topic  
 257 analysis conducted in Infranodus provides a visual thematic network graph of: ‘What does the impact of  
 258 good & bad *chaos* look like?’ The topic graph shows several topical clusters, with the most prominent  
 259



260 words and themes appearing larger in size and provides insights into the key themes and connections  
261 related to different forms of chaos in a peri-operative environment, based on the responses analysed.  
262 The central subtheme is "patient", which is closely connected to various aspects of the chaotic situation,  
263 such as the arrest, team, and management. The closer the nodes are together, the more  
264 linked/connected the topics are to each other. Key topical clusters include Teamwork Quality, Cardiac  
265 Arrest Management, Resuscitation Algorithms, and Decision Making. Contextual examples highlight  
266 challenges such as lack of clear leadership, inexperienced team members, and conflicting instructions.  
267 The orange boxes representing ambiguous statements refer to the example statement on the left-hand  
268 side of the figure as well as the orange topic box on the right-hand side of the figure. Overall, the topic  
269 graph emphasises the importance of effective teamwork, clear communication, well-defined protocols,  
270 and decisive leadership in managing chaotic situations in the peri-operative environment to ensure  
271 positive patient outcomes.

272

273

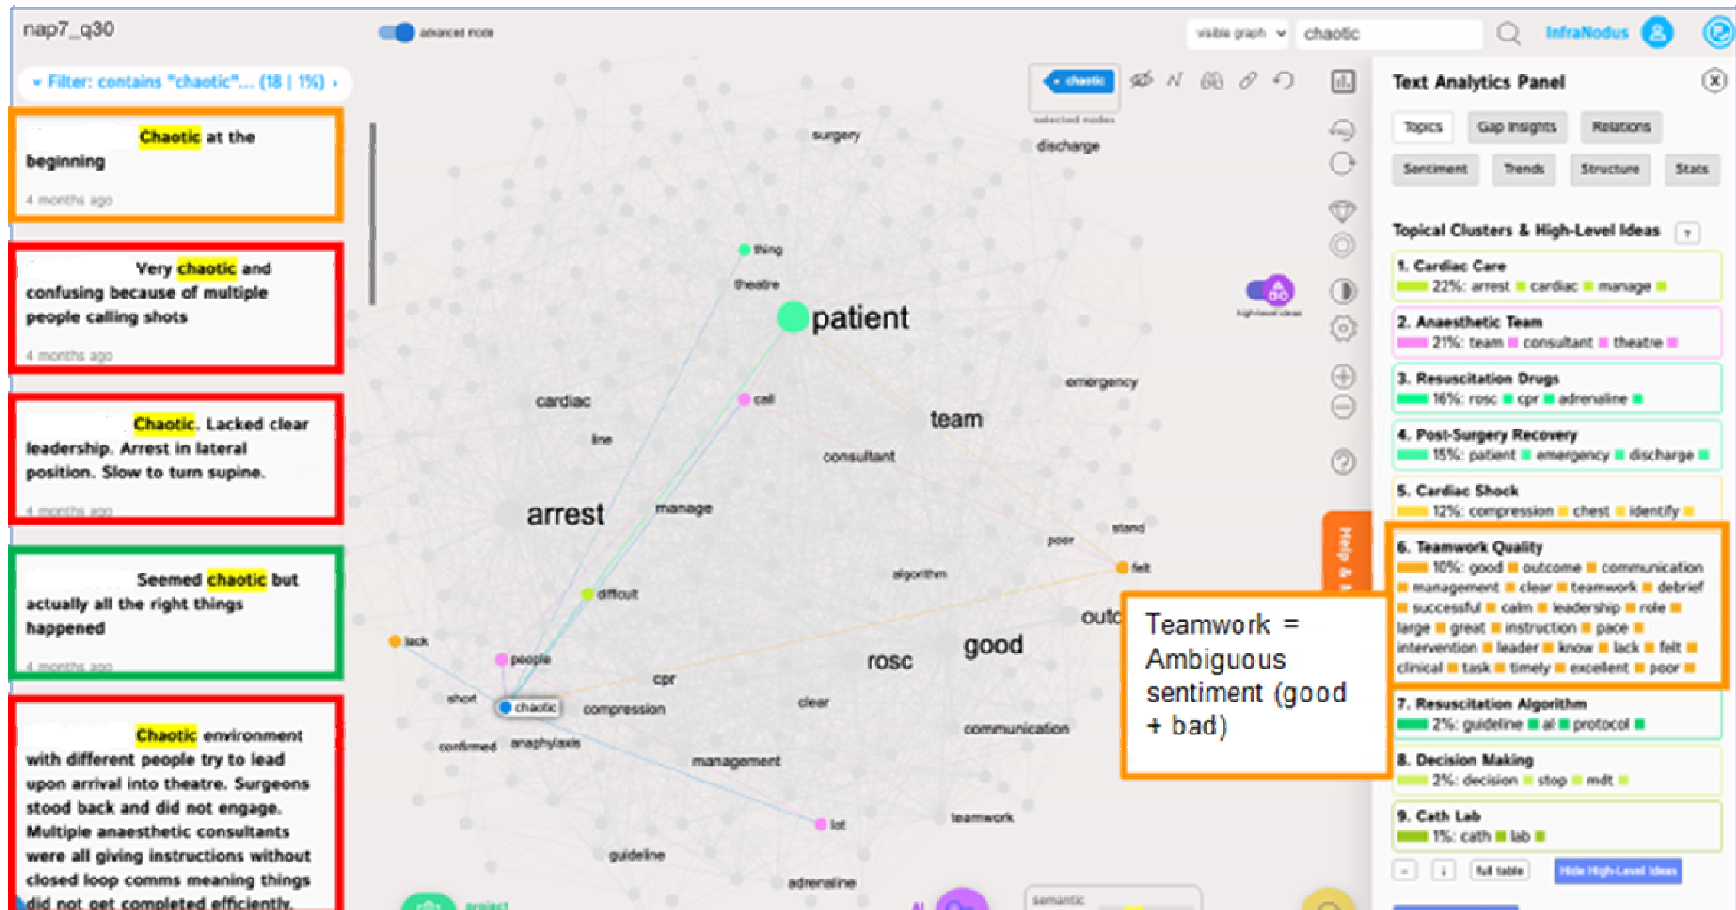

275  
276 Fig 3. Infranodus: Example thematic network graph for the theme 'chaotic' within Q30-Satisfaction with quality of the management of the  
277 arrest (Green boxes represent the positive sentiment statements, Red-negative sentiment, Orange-ambiguous).

## 279 **Discussion**

280 The comparison of human and machine-assisted analysis approaches in this study highlights the  
281 potential of AI-assisted tools in patient safety research. By using the AI tools Caplena and Infranodus to  
282 analyse the free-text data from the NAP7 survey we have aimed to validate the potential of AI-assisted  
283 tools in patient safety research. Our findings demonstrate that machine-assisted analysis can  
284 significantly reduce the time and effort required to process large volumes of qualitative data, enabling  
285 researchers to quickly identify key themes and sentiments. However, the results also show the  
286 importance of human expertise in refining and interpreting machine-generated outputs. The human  
287 analysis revealed the need for an additional sentiment category, "ambiguous", which captured the  
288 complexity and nuances of the peri-operative cardiac arrest experiences. The insights gained from the  
289 qualitative analysis of peri-operative cardiac arrest experiences highlight several areas where focused  
290 efforts and quality improvement initiatives can be implemented.

291 Sentiment analysis plays a crucial role in understanding the complex emotions and experiences of  
292 healthcare professionals involved in peri-operative cardiac arrest events. In our study, sentiment  
293 analysis led by AI was essential for capturing the wide range of emotions expressed in the free-text  
294 responses of anaesthetists. By delineating the nuances of sentiment, including the introduction of the  
295 "ambiguous" category, we were able to provide a more comprehensive and accurate representation of  
296 the respondents' experiences. This nuanced approach not only enriches the current research by  
297 highlighting the emotional intricacies of patient safety incidents but also sets a foundation for future  
298 studies to adopt more sophisticated sentiment analysis techniques. The ability to identify and interpret  
299 subtle differences in sentiment can inform targeted interventions, support staff wellbeing, and  
300 ultimately enhance patient safety practices.

301 The "ambiguous" category was introduced to represent statements that expressed a mix of positive,  
302 negative, and neutral sentiments, or where the overall sentiment was unclear. This category differed  
303 from "neutral" in that neutral statements were largely factual or objective, without expressing strong  
304 emotions or opinions. In contrast, ambiguous statements often contained conflicting sentiments or  
305 nuanced perspectives that could not be easily classified as positive, negative, or neutral.

306 The inclusion of the "ambiguous" category in the sentiment analysis framework (Tables 1 – 4) allowed  
307 for a more accurate representation of the complex emotions and experiences expressed by healthcare  
308 professionals in relation to patient safety incidents. Our findings show the importance of considering the  
309 emotional complexity and nuance alongside sentiment analysis to gain a more comprehensive  
310 understanding of the challenges faced by healthcare professionals during peri-operative cardiac arrests.  
311 By examining the findings through the lens of emotional complexity, we can identify key areas for  
312 improvement to enhance patient safety. The introduction of the "ambiguous" category highlights the  
313 value of human expertise and domain knowledge in refining ML models for patient safety analysis,  
314 ultimately leading to more accurate and actionable insights. These findings also underscore the  
315 complexity of staff experiences and the need to address the identified challenges and support for staff  
316 wellbeing.

317 It is essential to highlight that while the previous NAP7 paper [2] thoroughly demonstrated the impact of  
318 peri-operative cardiac arrest on anaesthetic staff, the present study focuses on the methods used to  
319 analyse the co-related themes, sentiments, and experiences of anaesthetic staff working in peri-  
320 operative cardiac arrest management, and a comparison of human and machine-assisted analysis  
321 approaches. The co-related themes identified in our analysis, such as teamwork, communication,  
322 leadership, patient outcomes, and the debriefing process (Tables 1-4), all played key roles in  
323 understanding the extent and nature of the impact of peri-operative cardiac arrest on anaesthetic staff.  
324 By focusing on these themes and their interrelationships, our study complements the findings of the

325 previous NAP7 paper and provides a more nuanced understanding of staff experiences and the factors  
326 that shape them.

327 Tables 1-4 highlight several relevant themes related to patient safety incidents and the management of  
328 peri-operative cardiac arrests. The sentiment analysis examples reveal nuanced insights into the  
329 complexities of these situations.

330 For example, regarding the theme Teamwork (Table 1): Our analysis revealed that effective teamwork,  
331 communication, and leadership were crucial factors in determining the success of peri-operative cardiac  
332 arrest management [21]. Sujan and colleagues [21] also emphasise the importance of considering these  
333 factors alongside AI use in healthcare. The identification of these factors in the analysis of patient safety  
334 free-text data is emphasised by Ede et al [22] in their synthesis of literature on teamwork and  
335 communication in escalating acute ward care. A flattened hierarchy and team functioning were key  
336 themes identified in the literature [23]. In our data, team functioning and teamwork were regular  
337 themes identified in many of the questions about the impact of peri-operative cardiac arrest (Table 1  
338 "Leadership and teamwork"). Table 1's ambiguous examples related to leadership and teamwork  
339 emphasise the unique challenges posed by peri-operative cardiac arrests, such as unfamiliar team  
340 dynamics, complex scenarios, and the need for effective communication and coordination between  
341 anaesthetic and surgical teams. Where teams worked well together, team relationships and  
342 communication were good, anaesthetists spoke more positively about the events, even if the overall  
343 outcome was not positive – ambiguous comments had a mixture of both positive and negative/neutral  
344 sentiment. These insights underscore the importance of training and simulation exercises that focus on  
345 enhancing non-technical skills in high-stress situations.

346 Regarding the theme on Guidelines (Table 2) which refers to the remarks about guidelines used to  
347 manage the peri-operative cardiac arrest, notably, the ambiguous examples shed light on the challenges

348 faced by anaesthetists and the need for targeted interventions. In Table 2, the ambiguous examples  
349 related to guidelines underscore the importance of addressing specific scenarios and nuances in peri-  
350 operative cardiac arrest management. Comments such as "*The QRH is useful but doesn't go through the*  
351 *nuances and most likely causes for specific patient cohorts*" and "*There [sic] still some grey areas with*  
352 *regards to advice, for example DNACPR patients undergoing surgery*" highlight the need for guidelines  
353 that provide guidance on handling complex situations and patient-specific factors.

354 In terms of the debrief theme which referred to the debriefing processes respondents had after the  
355 cardiac arrest (Table 3), sentiment and thematic analysis revealed positive, negative, neutral, and  
356 ambiguous sentiments about the debriefing process following peri-operative cardiac arrests. While  
357 some respondents expressed positive sentiments about the opportunity to discuss and analyse the  
358 event, others reported negative experiences, such as criticism or lack of proper training by those  
359 conducting debriefs. The ambiguous examples in Table 3, related to debriefing, reveal the importance of  
360 a well-structured and psychologically safe debriefing process. Comments like "*It felt disorganised with*  
361 *no communication or debrief but I felt satisfied because all the necessary steps were followed, and*  
362 *patient received best possible care*" highlight the need for a balance between adhering to protocols and  
363 fostering open communication during debriefs. These sentiments emphasise the importance of a well-  
364 structured, inclusive, and psychologically safe debriefing process. One way to address this would be to  
365 work on establishing a process that encourages the participation of all team members and provides  
366 opportunities for individual debriefing sessions to address personal concerns or emotional needs. By  
367 promoting positive sentiments and minimising negative ones, healthcare organisations can foster a  
368 culture of learning, support, and continuous improvement. Healthcare organisations can leverage these  
369 insights to develop staff support, such as training programs and simulation exercises, to enhance the  
370 non-technical skills of their staff and foster a culture of effective communication, teamwork, and  
371 decision-making.

372 The theme of Psychosocial Impact and Support (Table 4), which refers to general social support and  
373 well-being of the anaesthetists and how they were impacted by the cardiac arrest, encompassed a range  
374 of sentiments, with many ambiguous experiences reported. The ambiguous examples highlight the  
375 complex nature of these incidents and their emotional toll on anaesthetists. For instance, one  
376 respondent commented, "*I suppose it ended well so I didn't feel too bad. I'm no [sic] so sure about the*  
377 *junior members of the anaesthetic team,*" indicating a sense of uncertainty and concern for the well-  
378 being of their colleagues. Negative experiences were also prevalent, with anaesthetists expressing a lack  
379 of support from their organisations and increased anxiety when dealing with similar cases in the future.  
380 Positive experiences were less common but highlighted the importance of access to robust psychological  
381 support services and informal support from colleagues.

382 The insights gained from Table 4 emphasise the need for healthcare organisations to focus on providing  
383 structured support systems, including access to psychological services, peer support networks, and  
384 formal debriefing processes. Additionally, the findings highlight the importance of fostering a culture of  
385 learning and continuous improvement, where anaesthetists can openly discuss their experiences, share  
386 lessons learned, and receive constructive feedback to enhance their practice.

387 Future research in this area could explore the application of our novel Big Qual methods and AI-assisted  
388 analysis tools to other healthcare settings and patient safety incidents, such as medication errors or  
389 surgical complications. Additionally, studies could investigate the effectiveness of targeted interventions  
390 based on the insights gained from this research, such as improved debriefing processes, scenario-  
391 specific guidelines, and team training programmes. Researchers could also focus on refining machine  
392 learning models to better capture the nuances and complexities of healthcare professionals' experiences,  
393 ultimately leading to more accurate and actionable insights for enhancing patient safety. Furthermore,  
394 collaborations between healthcare professionals, data scientists, and patient safety experts could help  
395 develop standardised methodologies and best practices for applying AI-assisted qualitative analysis in

396 healthcare, ensuring the responsible and ethical use of these powerful tools. By continuing to explore  
397 the potential of Big Qual methods and AI-assisted analysis in patient safety research, we can work  
398 towards creating safer healthcare environments and improving outcomes for both patients and  
399 healthcare professionals.

## 400 **Limitations**

401 Our study has limitations that should be considered when interpreting the findings. First, while the  
402 overall response rate of 71% is similar to that of the NAP6 baseline survey [22], the response rates for  
403 each question progressively decreased from 100% to 92%, potentially introducing bias if non-  
404 respondents had different experiences or perspectives. However, the bias will be limited due to the  
405 whole population of anaesthetists being sampled, not just a representative sample within this  
406 population. Second, there is a risk of self-selection bias, as those with particularly memorable or  
407 impactful experiences might have been more inclined to participate, potentially skewing the results  
408 towards more extreme cases. Additionally, the specific focus on peri-operative cardiac arrests and the  
409 sole inclusion of anaesthetists' perspectives may limit the generalisability of our findings to other  
410 healthcare settings, patient safety incidents, and the viewpoints of other resuscitation team members.

411 Despite our adherence to information governance and data anonymisation, there are potential  
412 challenges and ethical considerations associated with implementing AI-assisted qualitative analysis in  
413 healthcare settings. Previous studies have highlighted the need for human oversight and interpretation  
414 [10] which we have tried to mitigate by introducing human input at each stage. However, the possibility  
415 of algorithmic bias in the initial training data of the AI computer tools used still perpetuates AI health  
416 inequalities based on lack of diversity in that specific AI training data [24, 25].

417 Furthermore, although we had five researchers from different backgrounds and specialties involved in  
418 the thematic analysis and three during the sentiment analysis process, we only had two researchers in



419 the discussions of the percentage agreement of the human analysis. These researchers will have  
420 brought their own subjectivity to the analysis. If there had been more team members, the percentage  
421 agreement may have been lower as there may have been more varied results across multiple  
422 researchers. Another potential limitation of our study is the involvement of the same human analysts in  
423 both the human-only and machine-assisted analyses. As the analysts gained familiarity with the data  
424 during the human-only analysis, there is a possibility of learning or spillover of knowledge when  
425 conducting the machine-assisted analysis. This familiarity could have influenced their interpretations  
426 and decisions during the machine-assisted analysis, potentially leading to a more refined or biased  
427 understanding of the data compared to analysts without prior exposure. However, the use of a  
428 structured sentiment analysis framework (Fig 2) and the involvement of three analysts from different  
429 backgrounds and specialties (EB, EK, SM1) at times, aimed to mitigate this potential bias by ensuring  
430 consistency and reducing individual subjectivity in the analysis process.

431 Despite these limitations, our study represents the analysis of the largest survey of anaesthetists to date  
432 examining individual preparedness, management, and experiences of peri-operative cardiac arrest. The  
433 use of Big Qual methods and an adaptive sentiment analysis and thematic analysis framework highlights  
434 the potential for applying these techniques to other areas of patient safety research. The insights gained  
435 can guide the development of tailored strategies and quality improvement initiatives to enhance patient  
436 safety.

## 437 **Conclusion**

438 This study employed a novel approach using AI-assisted data analysis tools to examine a substantial  
439 body of free-text survey data. The primary focus was to compare the effectiveness of machine-assisted  
440 analysis, using tools like Infranodus and Caplena, against human-only analysis in identifying themes,  
441 sentiments, and insights. The free-text responses from the Royal College of Anaesthetists' 7th National

442 Audit Project (NAP7) baseline survey on peri-operative cardiac arrest experiences served as a case study  
443 to test and validate this approach.

444 The machine-assisted analysis significantly streamlined the process of analysing the large dataset,  
445 enabling the efficient identification of key themes and sentiments. While the overall percentages of  
446 positive and negative sentiments did not differ drastically between the computer-assisted tagging and  
447 human annotation, the human input played a crucial role in introducing the "ambiguous" sentiment  
448 category. This new category allowed for the capture of more complex and nuanced responses that were  
449 initially tagged as neutral by the computer. By distinguishing between truly neutral sentiments and  
450 those that were more ambiguous, the human annotators provided a more comprehensive  
451 understanding of the anaesthetists' experiences, highlighting the value of human expertise in refining  
452 the sentiment analysis.

453 The insights gained from this study also complement the findings of the previous NAP7 paper [2] by  
454 providing a more in-depth understanding of the Big Qual methodology employed to investigate staff  
455 experiences.

456 The application of AI-assisted data analysis tools, combined with human expertise, offers a powerful  
457 approach to efficiently analyse large-scale qualitative datasets while preserving the nuance and  
458 complexity of the data. This study demonstrates the potential of this novel methodology to streamline  
459 the analysis process, reduce resource requirements, and generate meaningful insights from Big Qual  
460 data. The integration of NLP, ML, and human input allows for a more comprehensive understanding of  
461 the themes, sentiments, and experiences captured in free-text responses. As AI technologies continue to  
462 advance, their application in analysing diverse sources of qualitative data can add further value to the  
463 field of qualitative research, enabling researchers to uncover valuable insights and inform data-driven  
464 decision-making across various domains. This study underscores the importance of continued

465 interdisciplinary collaboration among domain experts, data scientists, and AI specialists to refine and  
466 optimise these methods, ensuring their reliability, validity, and ethical application in real-world contexts.

467

## 468 **Acknowledgements**

469 The NAP7 panel and team members (collaborators) are listed in the supporting information (S1). We  
470 thank all NAP7 Local reporters and their teams and all UK anaesthetists who completed surveys. We  
471 also thank Dr Paulina Bondaronek for her feedback on the methods section of the paper.

## 472 **References**

- 473 1. Kane AD, Armstrong RA, Kursumovic E, Cook TM, Oglesby FC, Cortes L. et al. Methods of the 7th  
474 National Audit Project (NAP7) of the Royal College of Anaesthetists: peri-operative cardiac arrest.  
475 *Anaesthesia*. 2022 Dec;77(12):1376-85. <https://doi.org/10.1111/anae.15856>.
- 476 2. Kursumovic E, Cook TM, Lucas DN, Davies MT, Martin S, Kane AD. Et al. The 7th National Audit  
477 Project (NAP7) baseline survey of individual anaesthetists: preparedness for and experiences of  
478 peri-operative cardiac arrest. *Anaesthesia*. 2023 Dec;78(12):1453-64.  
479 <https://doi.org/10.1111/anae.16154>.
- 480 3. Martin S, Clark SE, Gerrand C, Gilchrist K, Lawal M, Maio L. et al. Patients' experiences of a sarcoma  
481 diagnosis: a process mapping exercise of diagnostic pathways. *Cancers*. 2023 Aug 3;15(15):3946.  
482 <https://doi.org/10.3390/cancers15153946>.
- 483 4. Brower RL, Jones TB, Osborne-Lampkin LT, Hu S, Park-Gaghan TJ. Big qual: Defining and debating  
484 qualitative inquiry for large data sets. *International Journal of Qualitative Methods*. 2019 Nov 15;18.  
485 <https://doi.org/10.1177/1609406919880692>.
- 486 5. World Health Organization. Ethics and governance of artificial intelligence for health: guidance on  
487 large multi-modal models, 2024, [cited 5 February 2024], available from:  
488 <https://iris.who.int/bitstream/handle/10665/375579/9789240084759-eng.pdf?sequence=1.6>.
- 489 6. Karafillakis E, Martin S, Simas C, Olsson K, Takacs J, Dada S. et al. Methods for social media  
490 monitoring related to vaccination: systematic scoping review. *JMIR public health and surveillance*.  
491 2021 Feb 8;7(2):e17149. <http://publichealth.jmir.org/2021/2/e17149/>.
- 492 7. Bates DW, Levine D, Syrowatka A, Kuznetsova M, Craig KJ, Rui A. et al. The potential of artificial  
493 intelligence to improve patient safety: a scoping review. *NPJ digital medicine*. 2021 Mar 19;4(1):54.  
494 <https://doi.org/10.1038/s41746-021-00423-6>.

- 495 8. Martin S, Kilich E, Dada S, Kummervold PE, Denny C, Paterson P. et al. “Vaccines for pregnant  
496 women...?! Absurd”–Mapping maternal vaccination discourse and stance on social media over six  
497 months. *Vaccine*. 2020 Sep 29;38(42):6627-37. <https://doi.org/10.1016/j.vaccine.2020.07.072>.
- 498 9. Guetterman TC, Chang T, DeJonckheere M, Basu T, Scruggs E, Vydiswaran VV. Augmenting  
499 qualitative text analysis with natural language processing: methodological study. *Journal of medical  
500 Internet research*. 2018 Jun 29;20(6):e231. <https://www.jmir.org/2018/6/e231>.
- 501 10. Towler L, Bondaronek P, Papakonstantinou T, Amlôt R, Chadborn T, Ainsworth B. et al. Applying  
502 machine-learning to rapidly analyze large qualitative text datasets to inform the COVID-19 pandemic  
503 response: comparing human and machine-assisted topic analysis techniques. *Frontiers in Public  
504 Health*. 2023 Oct 31;11:1268223. <https://doi.org/10.3389/fpubh.2023.1268223>.
- 505 11. Evans HP, Anastasiou A, Edwards A, Hibbert P, Makeham M, Luz S. et al. Automated classification of  
506 primary care patient safety incident report content and severity using supervised machine learning  
507 (ML) approaches. *Health informatics journal*. 2020 Dec;26(4):3123-39.  
508 <https://doi.org/10.1177/14604582198331>.
- 509 12. Infranodus Software [cited 29 September 2023]. Available from: <https://infranodus.com/> .
- 510 13. Paranyushkin D. Infranodus: Generating insight using text network analysis. In *The world wide web  
511 conference 2019* May 13 (pp. 3584-3589). <https://doi.org/10.1145/3308558.3314123>.
- 512 14. Caplena v2 (Caplena AG, Zurich, Switzerland), [cited 1 February 2024]. Available from:  
513 <https://caplena.com/en/about/>.
- 514 15. Momentive. SurveyMonkey. Niskayuna, NY: Momentive, 2023. [cited 2 February 2024]. Available  
515 from: [SurveyMonkey - Free online survey software and questionnaire tool](https://www.surveymonkey.com/).
- 516 16. Pulsar Platform v2022 (Pulsar TRAC, first-party data tool, Pulsar Platform, London, UK). [Cited 1  
517 November 2023]. Available from: <https://www.pulsarplatform.com/solutions/audience-insights>.

- 518 17. O'Brien BC, Harris IB, Beckman TJ, Reed DA, Cook DA. Standards for reporting qualitative research: a  
519 synthesis of recommendations. *Academic medicine*. 2014 Sep 1;89(9):1245-51.  
520 <https://doi.org/10.1097/ACM.0000000000000388>.
- 521 18. Hutto C, Gilbert E. Vader: A parsimonious rule-based model for sentiment analysis of social media  
522 text. In Proceedings of the international AAAI conference on web and social media 2014 May 16 (Vol.  
523 8, No. 1, pp. 216-225). <https://doi.org/10.1609/icwsm.v8i1.14550>.
- 524 19. McHugh ML. Interrater reliability: the kappa statistic. *Biochemia medica*. 2012 Oct 15;22(3):276-82.  
525 <https://hrcak.srce.hr/89395>.
- 526 20. Kelly FE, Frerk C, Bailey CR, Cook TM, Ferguson K, Flin R. et al. Human factors in anaesthesia: a  
527 narrative review. *Anaesthesia*. 2023 Apr;78(4):479-90. <https://doi.org/10.1111/anae.15920>.
- 528 21. Sujan MA, Pozzi S, Valbonesi C. Reporting and learning: from extraordinary to ordinary. In Resilient  
529 Health Care, Volume 3 2016 Oct 3 (pp. 103-110). CRC Press.
- 530 22. Ede J, Petrinic T, Westgate V, Darbyshire J, Endacott R, Watkinson PJ. Human factors in escalating  
531 acute ward care: a qualitative evidence synthesis. *BMJ open quality*. 2021 Feb 1;10(1):e001145.  
532 <http://dx.doi.org/10.1136/bmjopen-2020-001145>.
- 533 23. Kemp HI, Cook TM, Thomas M, Harper NJ. UK anaesthetists' perspectives and experiences of severe  
534 perioperative anaphylaxis: NAP6 baseline survey. *BJA: British Journal of Anaesthesia*. 2017 Jul  
535 1;119(1):132-9. <https://doi.org/10.1093/bja/aex124>.
- 536 24. Leslie D, Mazumder A, Peppin A, Wolters MK, Hagerty A. Does "AI" stand for augmenting inequality  
537 in the era of covid-19 healthcare? *BMJ*. 2021 Mar 16;372. <https://doi.org/10.1136/bmj.n304>.
- 538 25. Agarwal R, Bjarnadottir M, Rhue L, Dugas M, Crowley K, Clark J. et al. Addressing algorithmic bias  
539 and the perpetuation of health inequities: An AI bias aware framework. *Health Policy and  
540 Technology*. 2023 Mar 1;12(1):100702. <https://doi.org/10.1016/j.hlpt.2022.100702>.

541

542 **Supporting information captions**

543 **S1 Appendix – Collaborator list**

544 **S2 Appendix-NAP7 Baseline Survey**

545 **S3 Appendix -Tables 2-6**

546
